# Supplementary material for: Integrator orchestrates RAS/ERK1/2 signaling transcriptional programs
Source: PubMed Central journal article supplement (PMC5666678; doi:10.1101/gad.301697.117), 2017-09-01

A

HeLa

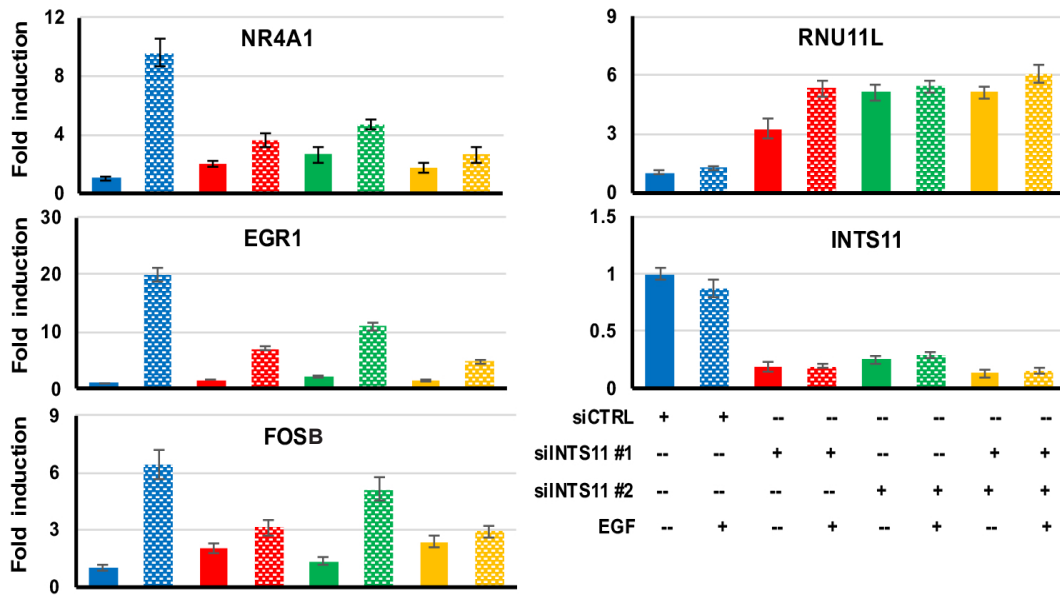

B

A549

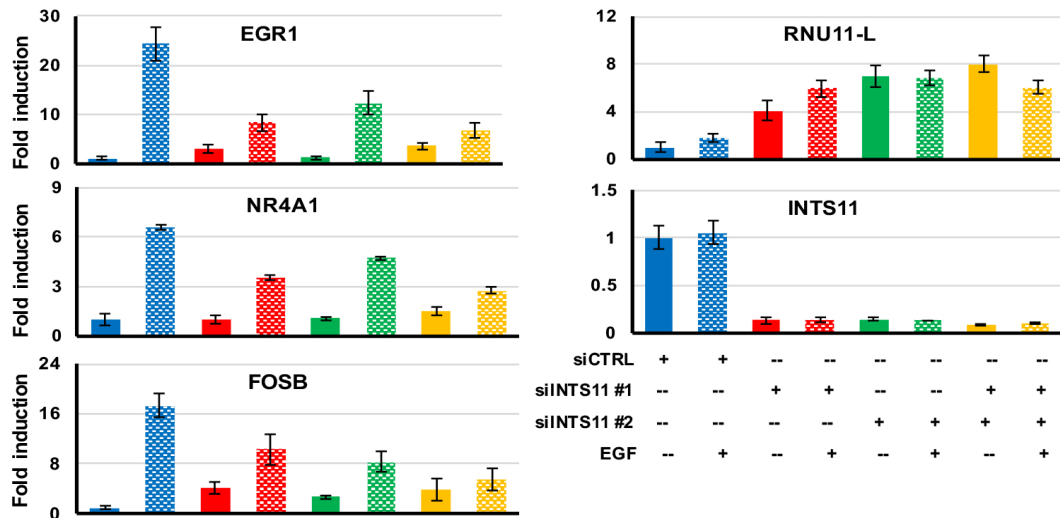

C

A375

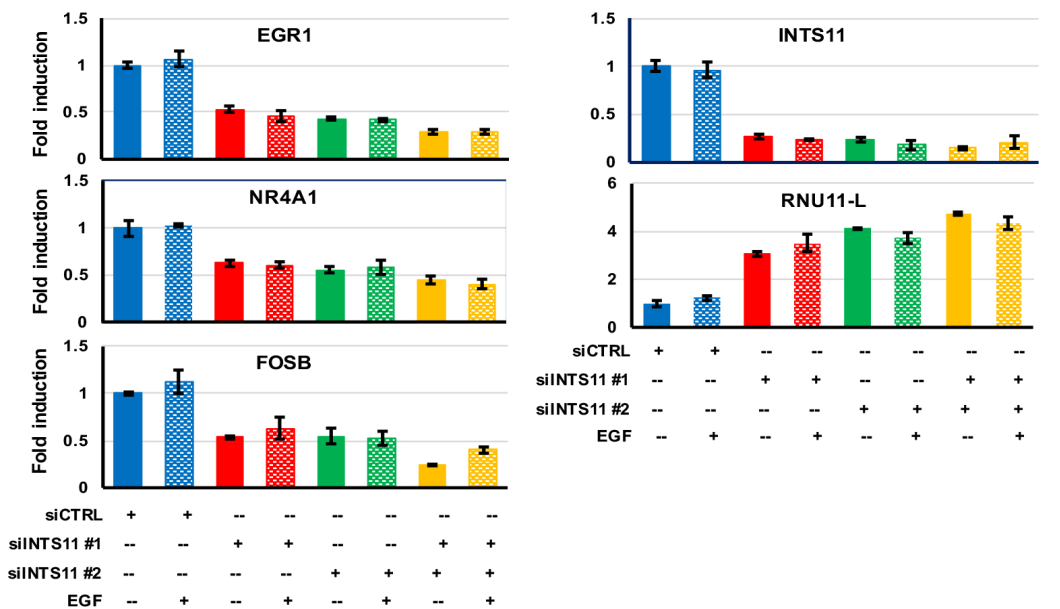

Supplement: supp_31.17.1809_Supplemental_Fig_S3.pdf [file supp_31.17.1809_Supplemental_Fig_S3.pdf]
