# Supplementary material for: Integrator orchestrates RAS/ERK1/2 signaling transcriptional programs
Source: PubMed Central journal article supplement (PMC5666678; doi:10.1101/gad.301697.117), 2017-09-01

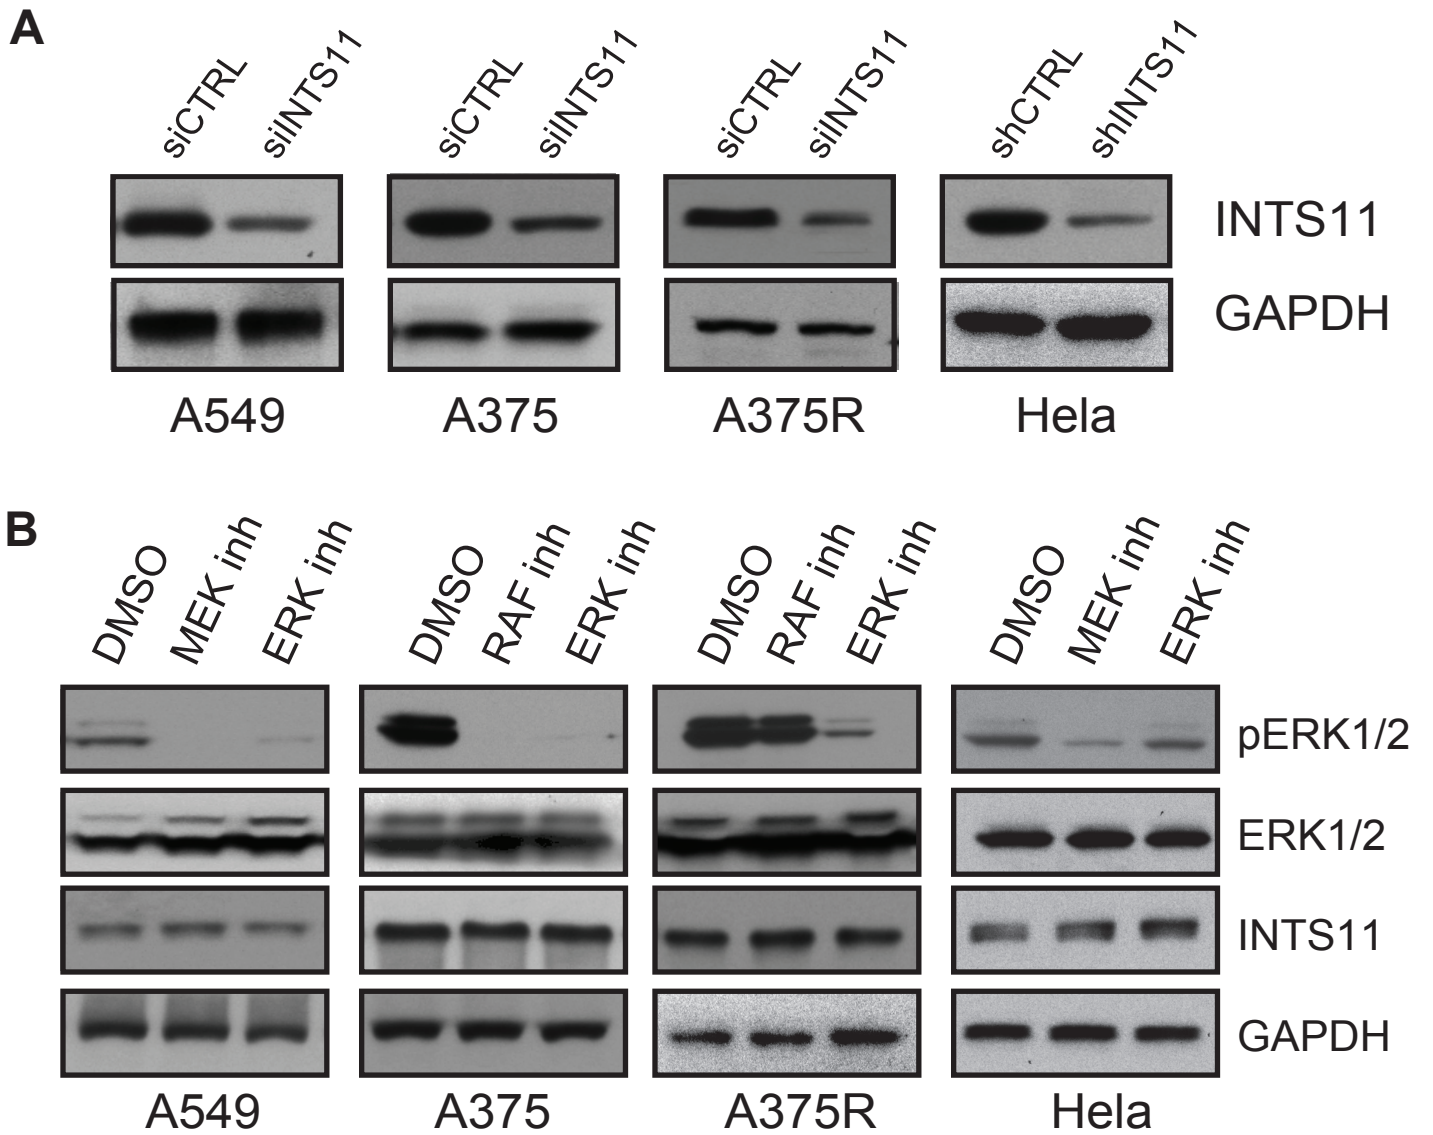

Supplement: supp_31.17.1809_Supplemental_Fig_S10.pdf [file supp_31.17.1809_Supplemental_Fig_S10.pdf]
